# Supplementary material for: Telomerase Reverse Transcriptase Promoter Mutations Identify a Genomically Defined and Highly Aggressive Human Pleural Mesothelioma Subgroup
Source: Oxford University Press journal article supplement (doi:10.1158/1078-0432.ccr-19-3573), 2020-04-21
Supplement: 10780432ccr193573-sup-231618_2_supp_6238384_q8xkms.docx [file 10780432ccr193573-sup-231618_2_supp_6238384_q8xkms.docx]

**Supplementary Figure S8**

**
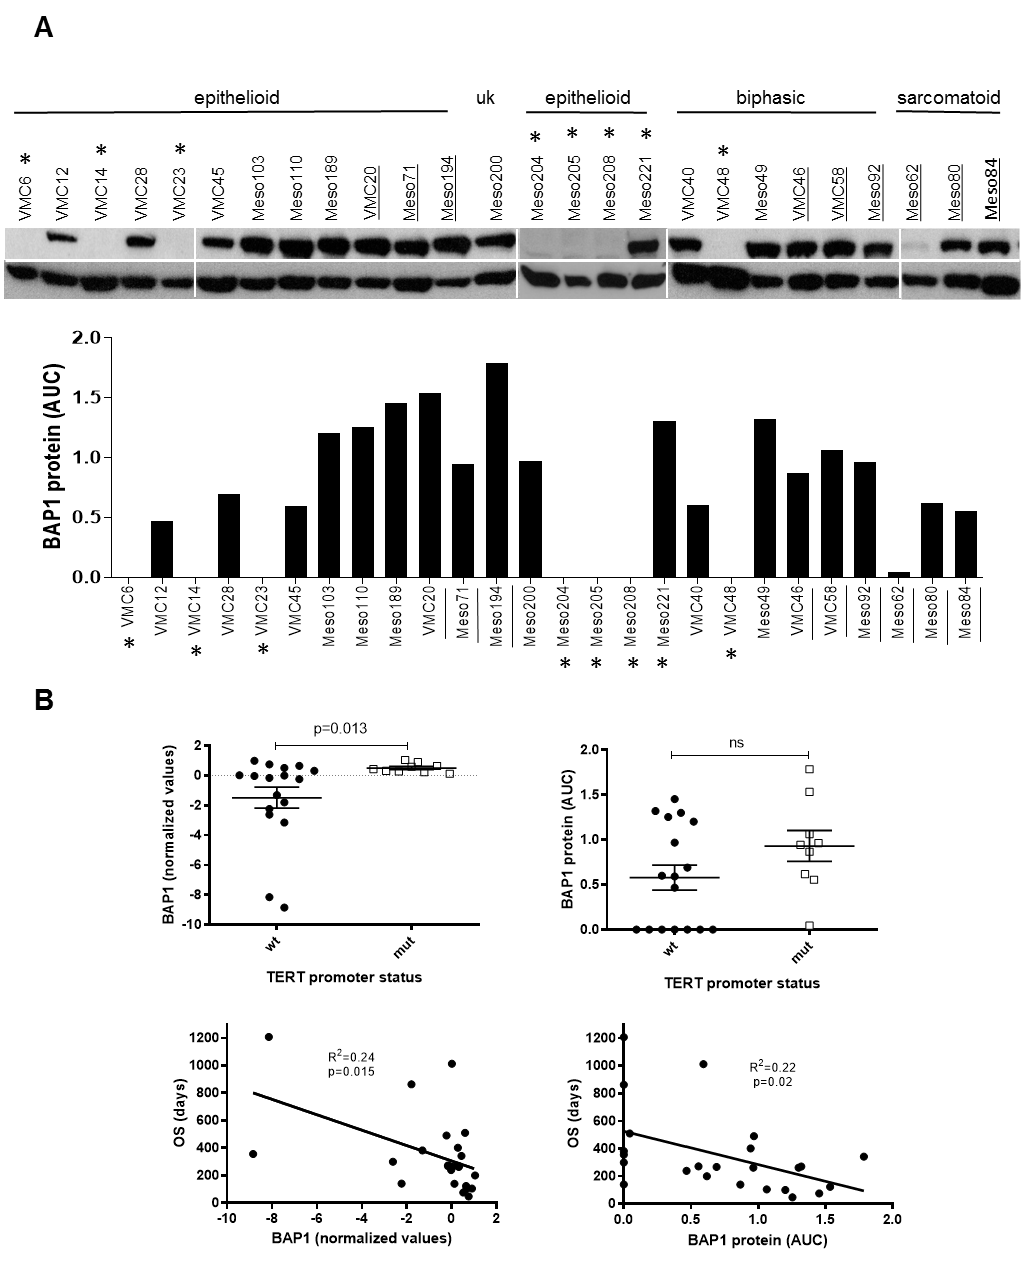
**

**Supplementary Figure S8. *BAP1* expression in MPM samples and its relation to *TERT* promoter status and patient overall survival.** (A)Western blot analysis of BAP1 protein levels (upper band) as compared to β-actin (lower band) in total protein lysates of the indicated MPM cell models (N=26) grouped according to histology. *TERT* promoter mutated samples are underlined. *BAP*1 mutated/deleted samples according to NGS data are indicated by asterisks. Protein levels were quantified relative to β-actin using ImageJ. (B)*BAP1* mRNA expression determined by expression array analysis (left) and protein levels by Western blot analysis (right) in the *TERT* promoter wild-type (wt, N=17) and mutated (mut, N=9) subgroup (upper panel) are shown. Single samples and mean ± SEM are depicted. Differences were tested for significance by two-tailed Student`s *t*-test with Welch`s correction and p-values are indicated. Lower panels show linear regression analyses between *BAP1* mRNA expression (left) and protein levels (right) with patient overall survival (OS). Correlation coefficient (R2)and p-value are indicated. Uk = unknown histology; AUC = area under the curve.
