# Supplementary material for: Telomerase Reverse Transcriptase Promoter Mutations Identify a Genomically Defined and Highly Aggressive Human Pleural Mesothelioma Subgroup
Source: Oxford University Press journal article supplement (doi:10.1158/1078-0432.ccr-19-3573), 2020-04-21
Supplement: 10780432ccr193573-sup-231618_2_supp_6238386_q8xw6d.docx [file 10780432ccr193573-sup-231618_2_supp_6238386_q8xw6d.docx]

**Supplementary Figure S6**

TCGA dataset

**Supplementary Figure S6. Relation between *TERT* mRNA expression and MPM patient survival in the TCGA dataset.** Linear regression analysis between MPM patient overall survival (OS) and *TERT* variance-stabilized mRNA expression data extracted from the Cancer Genome Atlas (TCGA) is shown. Correlation coefficient (R2)and p-value are indicated.
