# Supplementary material for: Telomerase Reverse Transcriptase Promoter Mutations Identify a Genomically Defined and Highly Aggressive Human Pleural Mesothelioma Subgroup
Source: Oxford University Press journal article supplement (doi:10.1158/1078-0432.ccr-19-3573), 2020-04-21
Supplement: 10780432ccr193573-sup-231618_2_supp_6238387_q8x7mt.docx [file 10780432ccr193573-sup-231618_2_supp_6238387_q8x7mt.docx]

**Supplementary Figure S5**


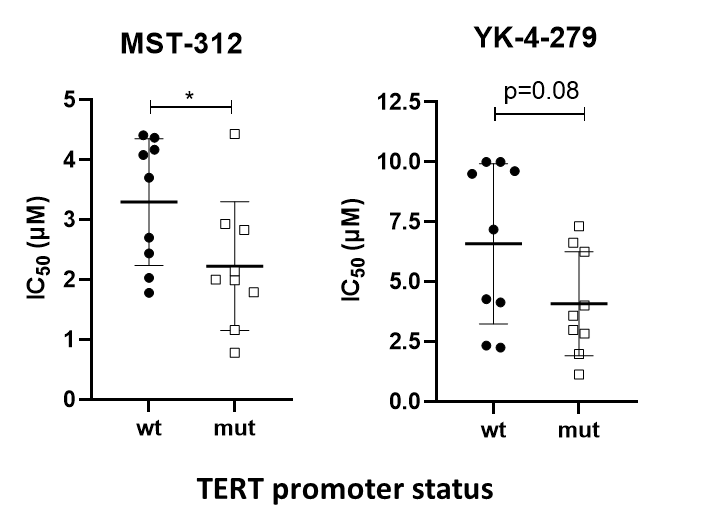


**Supplementary Figure S5: Impact of *TERT* promoter status on sensitivity of MPM cell models against pharmacological telomerase and ETS factor inhibition.** Mean IC50 values (± SD) for the telomerase inhibitor MST-312 and the ETS factor inhibitor YK-4-279 as indicated of *TERT* promoter wild-type (N=9) and mutated (N=9) models were determined by a 72h continuous drug exposure viability assay. IC50 values for each cell line are derived from at least three independent experiments in triplicate. Statistical significance was tested by two-tailed Student`s *t* test. * = p<0.05
